# Supplementary material for: Do Sexist Comments Hinder Participation in Online Political Discussions?
Source: Atypon-hosted journal article supplement (doi:10.1027/1864-1105/a000373), 2023-03-02
Supplement: 1864-1105_a000373_esm1.pdf [file 1864-1105_a000373_esm1.pdf]

Supplemental Material

Figure E1

Linear Models for Treatment Checks

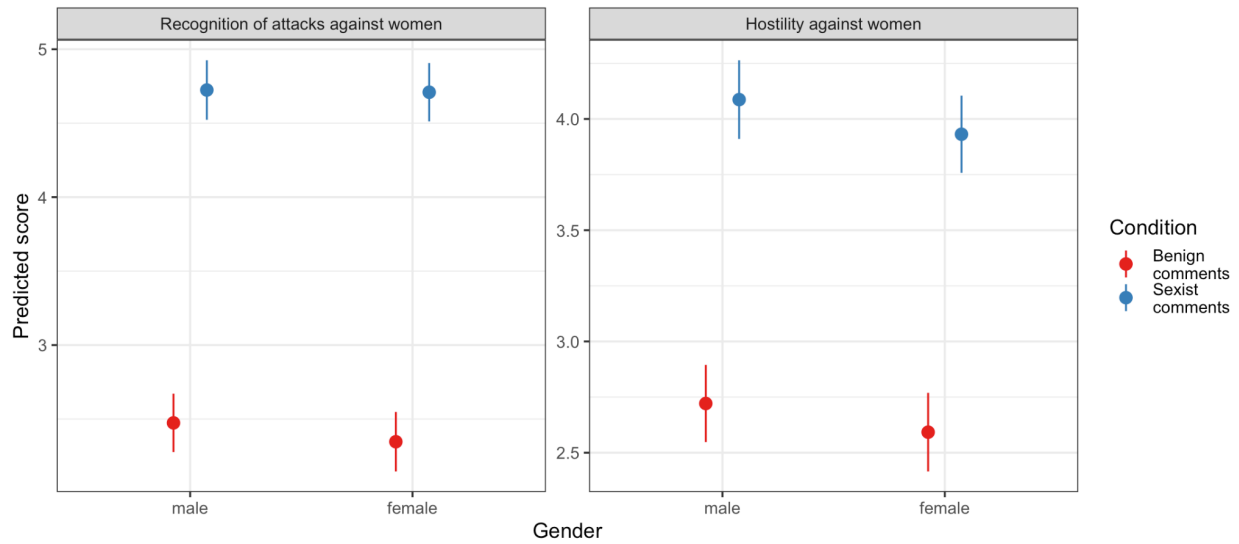

**Note. Recognition of attacks against women:** Gender (female):  $b = -0.07$ , 95% CI [-0.27, 0.13]; Condition (treatment):  $b = 2.31$ , 95% CI [2.11, 2.51]; Gender X condition:  $b = 0.11$ , 95% CI [-0.29, 0.51]; Model:  $F(3, 746) = 171.58$ ,  $p < 0.001$ , adj.  $R^2 = 0.41$ . **Hostility against women:** Gender (female):  $b = -0.14$ , 95% CI [-0.32, 0.03]; Condition (treatment):  $b = 1.35$ , 95% CI [1.18, 1.53]; Gender X condition:  $b = -0.03$ , 95% CI [-0.38, 0.32]; Model:  $F(3, 746) = 76.95$ ,  $p < 0.001$ , adj.  $R^2 = 0.23$

## Figure E2

Original stimuli treatment condition


meta.tagesschau.de

[Startseite](#) [Bewertete Beiträge](#) [Kommentare](#) [Tags](#) [Geo-Tags](#) [Netiquette](#)

Ihre Meinung zu:

### Neue Studie zu Elterngeld und Elternzeit

3. Juni 2020 - 16:40 Uhr



Eine neue Studie der Universität Bielefeld zeigt, dass das Elterngeld gut ankommt. "Seit der Einführung des Elterngelds nehmen sowohl Mütter als auch Väter länger Elternzeit", sagte Frau Dr. Schmidt, wissenschaftliche Leiterin der Studie. Nach wie vor gingen aber wesentlich mehr Mütter in Elternzeit. Auch seien die Bezugszeiten von Vätern sehr viel kürzer.

[Artikel auf tagesschau.de](#)

Schlagwörter der Meldung: [Elterngeld](#) [Elternzeit](#) [Studie](#)

Geo-Schlagwörter der Meldung: [Bielefeld](#) [Deutschland](#) [Europa](#)

## Kommentare

Am 03. Juni 2020 um 17:01 von ThMa

**Ich freue mich auf Elternzeit**

Es ist doch interessant zu sehen wie sich die Zahlen in den letzten Jahren verändert haben. Ich kenne auch viele die in Elternzeit sind und viel Spaß mit ihren kleinen haben. Das mache ich bald auch ☺

Am 03. Juni 2020 um 17:15 von micmar

**Die Frau kann nicht rechnen**

Die "Studie" dieser "Wissenschaftlerin" sagt doch gar nichts! Die Frau Doktorin hat sich doch verrechnet, das kann gar nicht sein. Die gute Frau sollte lieber noch mal einen Grundkurs 6. Klasse Mathematik machen, bevor sie hier mit so "Studien" um die Ecke kommt. Bleib lieber mal selber zuhause und kümmere dich um deine Kinder! Falls du überhaupt welche hast, wäre vielleicht auch besser, wenn nicht... Eine echte Wissenschaftlerin ist die Frau Doktor Schmidt nicht!!!

Am 03. Juni 2020 um 17:30 von TN255

**@ micmar**

Genau so!!! Traue keiner Statistik, die du nicht selbst gefälscht hast. Wobei die Frau Doktor wahrscheinlich sogar zum fälschen zu blöd ist.

Am 03. Juni 2020 um 17:37 von Napf

**von micmar**

Jaja, die Frau "Doktorin" Schmidt... Wahrscheinlich selber noch nie um ein Kind gekümmert, will uns aber vorschreiben, was wir machen sollen. Typisch Frau!

Am 03. Juni 2020 um 17:39 von Corax

**Wie macht ihr das mit der Elternzeit?**

Es ist echt spannend zu hören, wie sich das entwickelt. Wir stehen aktuell vor der Entscheidung wer für wie lange Elternzeit macht und müssen uns das beste für unser Kind überlegen. Wie sieht das bei Euch allen aus? Wie organisiert ihr die Elternzeit oder wie würdet ihr das machen?

Am 03. Juni 2020 um 17:41 von Möbius

**@ Corax**

Ja, das ist echt eine voll wichtige Frage. Wir waren beide in Elternzeit und es war eine tolle Erfahrung. Ich verstehe aber auch total, wenn das bei einer Familie nicht geht. Ich hoffe, ihr findet für euch die beste Lösung!

Am 03. Juni 2020 um 17:45 von O\_50

**Zahlen und Gefühle sind nicht das gleiche!**

Ich finde es ja auch schwierig immer nur mit so Zahlen zu kommen. Man sollte mal die Mamas und Papas fragen was sie wirklich fühlen.

Am 03. Juni 2020 um 17:57 von welttoffen

**Mehr Elterngeld!**

Alles gut, interessante Studie. Aber was ich schon noch sagen muss: Das Elterngeld ist viel zu niedrig. Da müsste die Politik mal was machen.

**Figure E3***Original stimuli control condition*


The screenshot shows the website meta.tagesschau.de with a navigation bar containing links for 'Startseite', 'Bewertete Beiträge', 'Kommentare', 'Tags', 'Geo-Tags', and 'Netiquette'. The main content area features a news item with the headline 'Neue Studie zu Elterngeld und Elternzeit' dated '3. Juni 2020 - 16:40 Uhr'. To the left of the text is a photograph of a family (a man, a woman, and a baby) sitting on a bed. The text of the article discusses a study from the University of Bielefeld regarding parental leave and parental allowance. Below the article text are tags for 'Elterngeld', 'Elternzeit', and 'Studie', and geo-tags for 'Bielefeld', 'Deutschland', and 'Europa'.

**meta.tagesschau.de**

Startseite Bewertete Beiträge ▾ Kommentare ▾ Tags ▾ Geo-Tags ▾ Netiquette

Ihre Meinung zu:

**Neue Studie zu Elterngeld und Elternzeit**

3. Juni 2020 - 16:40 Uhr

 Eine neue Studie der Universität Bielefeld zeigt, dass das Elterngeld gut ankommt. "Seit der Einführung des Elterngelds nehmen sowohl Mütter als auch Väter länger Elternzeit", sagte Frau Dr. Schmidt, wissenschaftliche Leiterin der Studie. Nach wie vor gingen aber wesentlich mehr Mütter in Elternzeit. Auch seien die Bezugszeiten von Vätern sehr viel kürzer.

| [Artikel auf tagesschau.de](#)

Schlagwörter der Meldung: Elterngeld Elternzeit Studie

Geo-Schlagwörter der Meldung: Bielefeld Deutschland Europa

**Kommentare**

Am 03. Juni 2020 um 17:01 von ThMa

**Ich freue mich auf Elternzeit**

Es ist doch interessant zu sehen wie sich die Zahlen in den letzten Jahren verändert haben. Ich kenne auch viele die in Elternzeit sind und viel Spaß mit ihren kleinen haben. Das mache ich bald auch ☺

Am 03. Juni 2020 um 17:39 von Corax

**Wie macht ihr das mit der Elternzeit?**

Es ist echt spannend zu hören, wie sich das entwickelt. Wir stehen aktuell vor der Entscheidung wer für wie lange Elternzeit macht und müssen uns das beste für unser Kind überlegen. Wie sieht das bei Euch allen aus? Wie organisiert ihr die Elternzeit oder wie würdet ihr das machen?

Am 03. Juni 2020 um 17:41 von Möbius

**@ Corax**

Ja, das ist echt eine voll wichtige Frage. Wir waren beide in Elternzeit und es war eine tolle Erfahrung. Ich verstehe aber auch total, wenn das bei einer Familie nicht geht. Ich hoffe, ihr findet für euch die beste Lösung!

Am 03. Juni 2020 um 17:45 von O\_50

**Zahlen und Gefühle sind nicht das gleiche!**

Ich finde es ja auch schwierig immer nur mit so Zahlen zu kommen. Man sollte mal die Mamas und Papas fragen was sie wirklich fühlen.

Am 03. Juni 2020 um 17:57 von weltoffen

**Mehr Elterngeld!**

Alles gut, interessante Studie. Aber was ich schon noch sagen muss: Das Elterngeld ist viel zu niedrig. Da müsste die Politik mal was machen.

**Supplement E4**

*Translation of stimuli treatment condition*

**Translation by the authors of the stimulus material for the paper: Do sexist comments hinder participation in online political discussions? A preregistered experiment**

**[Icon] meta.tagesschau.de**

**[Navigation]**

**[headline]**

Your opinion on:

**New study on parental allowance and parental leave**

June 3<sup>rd</sup> 2020 – 04:40 pm

**[running text]**

A new study by the University of Bielefeld shows that parental allowance is well received.

“Since the launch of parental allowance, both mothers and fathers have been taking longer parental leave”, said Dr. Schmidt, scientific director of the study.

However, a lot more mothers than fathers took parental leave. Fathers also take much shorter periods of leave.

[keywords] parental allowance, parental leave, study

[geo-keywords] Bielefeld, Germany, Europe

**[heading comment section]**

**Comments**

On June 3<sup>rd</sup> 2020 at 05:01 pm from ThMA

**I'm looking forward to taking parental leave**

It sure is interesting how the numbers have changed over the past years. I also know a lot of people who are taking parental leave and they have a lot of fun with their little ones. I will have it soon, too 😊

On June 3<sup>rd</sup> 2020 at 05:15 pm from micmar

**The woman can't count**

The “study” of this “scientist” says nothing! Miss PhD has miscalculated, this cannot be true. The woman should rather attend a 6<sup>th</sup> grade basic math class again before she comes up with “studies” like that. Better stay at home yourself and take care of your children! If you have any at all, maybe it would also be better if not. Mrs. Doctor Schmidt is not a real scientist!!!

On June 3<sup>rd</sup> 2020 at 05:30 pm from TN255

**@ micmar**

That’s it!!! Do not trust any statistics that you have not faked yourself. Whereby the doctor is probably too stupid to even fake.

On June 3<sup>rd</sup> 2020 at 05:37 pm from Napf

**@ micmar**

Yep, Mrs. “Doctor” Schmidt... Probably never took care of a child herself before, but wants to tell us what to do. Typical woman!

On June 3<sup>rd</sup> 2020 at 05:39 pm from Corax

**How do you handle parental leave?**

It is exciting to hear, how things develop. We are currently faced with the decision of who will take parental leave for how long and have to think about what is best for our child. How do you guys handle it? How do you or how would you organize the parental leave?

On June 3<sup>rd</sup> 2020 at 05:41 pm from Möbius

**@Corax**

Yes, this is indeed an important question. We both took parental leave, and it was a great experience. But I also totally understand if that does not work for every family. I hope you will find the best solution for you!

On June 3<sup>rd</sup> 2020 at 05:45 pm from O\_50

**Numbers and feelings are not the same!**

I also find it difficult to argue only with some numbers. The moms and dads should be asked what they really feel.

On June 3<sup>rd</sup> 2020 at 05:57 pm from weltoffen

**More parental allowance!**

All good, interesting study. But what I still have to say: The parental allowance is way too low. The politics should do something here.

**[Navigation]**



**Supplement E5**

*Translation of stimuli control condition*

**Translation by the authors of the stimulus material for the paper: Do sexist comments hinder participation in online political discussions? A preregistered experiment**

**[Icon] meta.tagesschau.de**

**[Navigation]**

**[headline]**

Your opinion on:

**New study on parental allowance and parental leave**

June 3<sup>rd</sup> 2020 – 04:40 pm

**[running text]**

A new study by the University of Bielefeld shows that parental allowance is well received.

“Since the launch of parental allowance, both mothers and fathers have been taking longer parental leave”, said Dr. Schmidt, scientific director of the study.

However, a lot more mothers than fathers took parental leave. Fathers also take much shorter periods of leave.

[keywords] parental allowance, parental leave, study

[geo-keywords] Bielefeld, Germany, Europe

**[heading comment section]**

**Comments**

On June 3<sup>rd</sup> 2020 at 05:01 pm from ThMA

**I'm looking forward to taking parental leave**

It sure is interesting how the numbers have changed over the past years. I also know a lot of people who are taking parental leave and they have a lot of fun with their little ones. I will have it soon, too 😊

On June 3<sup>rd</sup> 2020 at 05:39 pm from Corax

**How do you handle parental leave?**

It is exciting to hear, how things develop. We are currently faced with the decision of who will take parental leave for how long and have to think about what is best for our child.

How do you guys handle it? How do you or how would you organize the parental leave?

On June 3<sup>rd</sup> 2020 at 05:41 pm from Möbius

**@Corax**

Yes, this is indeed an important question. We both took parental leave, and it was a great experience. But I also totally understand if that does not work for every family. I hope you will find the best solution for you!

On June 3<sup>rd</sup> 2020 at 05:45 pm from O\_50

**Numbers and feelings are not the same!**

I also find it difficult to argue only with some numbers. The moms and dads should be asked what they really feel.

On June 3<sup>rd</sup> 2020 at 05:57 pm from weltoffen

**More parental allowance!**

All good, interesting study. But what I still have to say: The parental allowance is way too low. The politics should do something here.

**[Navigation]**

**Supplement E6***Study items*

Items are translated by the authors. The original version of the questionnaire and its full translation are available through the study's OSF repository.

**Control item discussion frequency**

The following questions deal with the frequency of participation in online discussions that you take part in.

- How often do you interchange with other social media users (Twitter, Facebook, YouTube, or the like)?
- How often do you participate in discussions on social media platforms (Twitter, Facebook, YouTube, or the like) that are politically and or socially relevant?
- How often do you leave comments on websites of newspapers, TV shows, or radio broadcasts?
- How often do you participate in comment-based discussions that are politically and or socially relevant on websites of newspapers, TV shows, or radio broadcasts?

1 [never]

2

3

4 [sometimes]

5

6

7 [very often]

**DV political expression**

Many news portals offer their users the possibility to discuss articles with other users. Please read the following example thoroughly. Please read the comments to the very end. Many of the following questions relate to this example.

[Stimulus]

**How likely is it that you would post a comment in this discussion?**

Fill-in instruction: You can rate all your answers on a scale of 1 (very unlikely) to 7 (highly likely).

**How likely is it that you would state your personal opinion on the topic of parental leave in this discussion?**

Fill-in instruction: You can rate all your answers on a scale of 1 (very unlikely) to 7 (highly likely).

- 1 [very unlikely]
- 2 [unlikely]
- 3 [rather unlikely]
- 4 [maybe]
- 5 [rather likely]
- 6 [likely]
- 7 [highly likely]

### **DV expected sanctions**

Imagine putting yourself in the situation just described: What negative consequences do you think you would have to face if you participated in those discussions?

Fill-in instruction: You can rate all your answers on a scale of 1 (does not apply at all) to 7 (fully applies).

I would be afraid of...

- ... being attacked publicly.
- ... being verbally attacked.
- ... being laughed at.
- ... getting offended.
- ... being exposed.
- ... being bullied.
- ... being personally stalked online (Cyberstalking).
- ... not being taken seriously.
- ... being ignored.

- 1 [does not apply at all]
- 2 [mostly does not apply]
- 3 [rather does not apply]
- 4 [partly applies/ partially does not apply]
- 5 [rather applies]
- 6 [mostly applies]
- 7 [fully applies]

### **DV perceived internal efficacy**

In view of the discussion you just saw: How much do the following statements apply to you?

Fill-in instruction: You can rate all your answers on a scale of 1 (does not apply at all) to 7 (fully applies).

- I don't think I have anything to contribute to this discussion.
- I know too little about the subject to participate in the discussion.
- I find that the topic of the discussion does not concern me.
- I am not sure I have enough knowledge about the topic to participate in a discussion.
- Please check "does not apply at all" in this line.

- I feel able to inform others about this issue.

- 1 [does not apply at all]
- 2 [mostly does not apply]
- 3 [rather does not apply]
- 4 [partly applies/ partially does not apply]
- 5 [rather applies]
- 6 [mostly applies]
- 7 [fully applies]

### **Treatment checks**

**We are interested in what you think of the discussion you have just seen.**

Fill-in instruction: You can rate all your answers on a scale of 1 (Do not agree at all) to 7 (fully agree).

- Comments portrayed women as incompetent.
- Women were attacked in the comments.
- Comments referred to the gender of the scientist.
- Women were insulted in the comments.
- Women are not welcome in this discussion.
- Women are more likely to be verbally attacked in this discussion than men.
- Women's opinions are not taken seriously in this discussion.
- Women's opinions are not valued in this discussion.
- Women are more likely to get offended in this discussion than men.
- Women are more likely to be bullied in this discussion than men.
- It is dangerous for women to participate in this discussion.
- There are no consequences for women to participate in this discussion.

- 1 [Do not agree at all]
- 2 [mostly disagree]
- 3 [rather disagree]
- 4 [partly agree / partly disagree]
- 5 [rather agree]
- 6 [mostly agree]
- 7 [fully agree]
